# Supplementary material for: Green and efficient three-component synthesis of 4H-pyran catalysed by CuFe2O4@starch as a magnetically recyclable bionanocatalyst
Source: R Soc Open Sci. 2020 Jul 1;7(7):200385. doi: 10.1098/rsos.200385 (PMC7428224; doi:10.1098/rsos.200385)
Supplement: Prof A.Maleki_Figure 4_ESM [file rsos200385supp6.xlsx]

## Sheet: Sheet1
2019.11.12	10:36:08
Sample:
Lambda1	=	1.5406
Lambda2	=	1.54439
Lambdam	=	1.54186
R	=	0.497
2Theta	I
Result	vector
CuFe2O4@starch (I)				Reused CuFe2O4@starch (II)
Main Data		Scheme Data for clarifying the chart		Main Data
A	B	C=(B+40)
5	53	93		5	50
5.04	57	97		5.04	51
5.08	57	97		5.08	51
5.12	37	77		5.12	54
5.16	74	114		5.16	53
5.2	71	111		5.2	58
5.24	42	82		5.24	41
5.28	56	96		5.28	49
5.32	48	88		5.32	44
5.36	58	98		5.36	54
5.4	45	85		5.4	46
5.44	64	104		5.44	47
5.48	56	96		5.48	44
5.52	45	85		5.52	47
5.56	57	97		5.56	43
5.6	50	90		5.6	44
5.64	51	91		5.64	44
5.68	58	98		5.68	51
5.72	50	90		5.72	48
5.76	62	102		5.76	54
5.8	62	102		5.8	53
5.84	55	95		5.84	52
5.88	48	88		5.88	37
5.92	39	79		5.92	44
5.96	46	86		5.96	48
6	53	93		6	44
6.04	51	91		6.04	44
6.08	38	78		6.08	35
6.12	45	85		6.12	42
6.16	43	83		6.16	42
6.2	53	93		6.2	45
6.24	48	88		6.24	37
6.28	39	79		6.28	39
6.32	37	77		6.32	36
6.36	43	83		6.36	35
6.4	48	88		6.4	41
6.44	39	79		6.44	38
6.48	56	96		6.48	40
6.52	41	81		6.52	37
6.56	34	74		6.56	37
6.6	43	83		6.6	40
6.64	35	75		6.64	35
6.68	48	88		6.68	36
6.72	38	78		6.72	35
6.76	34	74		6.76	35
6.8	52	92		6.8	45
6.84	51	91		6.84	41
6.88	39	79		6.88	34
6.92	38	78		6.92	32
6.96	43	83		6.96	35
7	34	74		7	32
7.04	62	102		7.04	51
7.08	32	72		7.08	32
7.12	40	80		7.12	39
7.16	36	76		7.16	36
7.2	30	70		7.2	26
7.24	32	72		7.24	33
7.28	38	78		7.28	32
7.32	42	82		7.32	34
7.36	38	78		7.36	33
7.4	46	86		7.4	35
7.44	35	75		7.44	24
7.48	36	76		7.48	32
7.52	36	76		7.52	30
7.56	37	77		7.56	28
7.6	39	79		7.6	37
7.64	25	65		7.64	26
7.68	43	83		7.68	32
7.72	39	79		7.72	30
7.76	32	72		7.76	32
7.8	26	66		7.8	29
7.84	41	81		7.84	33
7.88	42	82		7.88	37
7.92	23	63		7.92	24
7.96	46	86		7.96	31
8	44	84		8	33
8.04	33	73		8.04	26
8.08	26	66		8.08	26
8.12	39	79		8.12	32
8.16	36	76		8.16	34
8.2	32	72		8.2	25
8.24	35	75		8.24	35
8.28	36	76		8.28	27
8.32	55	95		8.32	40
8.36	32	72		8.36	26
8.4	21	61		8.4	26
8.44	34	74		8.44	29
8.48	25	65		8.48	25
8.52	37	77		8.52	35
8.56	20	60		8.56	19
8.6	32	72		8.6	27
8.64	28	68		8.64	22
8.68	34	74		8.68	28
8.72	46	86		8.72	35
8.76	26	66		8.76	30
8.8	33	73		8.8	24
8.84	23	63		8.84	24
8.88	19	59		8.88	22
8.92	38	78		8.92	31
8.96	34	74		8.96	28
9	51	91		9	34
9.04	33	73		9.04	27
9.08	37	77		9.08	28
9.12	30	70		9.12	30
9.16	32	72		9.16	22
9.2	16	56		9.2	18
9.24	28	68		9.24	21
9.28	42	82		9.28	27
9.32	21	61		9.32	19
9.36	25	65		9.36	24
9.4	34	74		9.4	28
9.44	35	75		9.44	29
9.48	48	88		9.48	32
9.52	28	68		9.52	31
9.56	39	79		9.56	28
9.6	32	72		9.6	27
9.64	36	76		9.64	28
9.68	26	66		9.68	30
9.72	37	77		9.72	32
9.76	42	82		9.76	33
9.8	39	79		9.8	31
9.84	40	80		9.84	31
9.88	45	85		9.88	31
9.92	36	76		9.92	34
9.96	32	72		9.96	24
10	25	65		10	30
10.04	32	72		10.04	26
10.08	40	80		10.08	33
10.12	45	85		10.12	32
10.16	32	72		10.16	30
10.2	30	70		10.2	23
10.24	30	70		10.24	18
10.28	33	73		10.28	28
10.32	42	82		10.32	32
10.36	34	74		10.36	30
10.4	28	68		10.4	26
10.44	42	82		10.44	32
10.48	24	64		10.48	22
10.52	28	68		10.52	27
10.56	40	80		10.56	26
10.6	45	85		10.6	37
10.64	53	93		10.64	35
10.68	33	73		10.68	27
10.72	42	82		10.72	30
10.76	37	77		10.76	28
10.8	42	82		10.8	34
10.84	48	88		10.84	38
10.88	37	77		10.88	30
10.92	39	79		10.92	33
10.96	42	82		10.96	33
11	27	67		11	24
11.04	34	74		11.04	27
11.08	37	77		11.08	27
11.12	27	67		11.12	23
11.16	20	60		11.16	24
11.2	36	76		11.2	33
11.24	33	73		11.24	34
11.28	33	73		11.28	23
11.32	42	82		11.32	34
11.36	32	72		11.36	25
11.4	40	80		11.4	34
11.44	42	82		11.44	35
11.48	43	83		11.48	30
11.52	44	84		11.52	29
11.56	39	79		11.56	45
11.6	50	90		11.6	46
11.64	37	77		11.64	43
11.68	43	83		11.68	36
11.72	32	72		11.72	28
11.76	29	69		11.76	23
11.8	41	81		11.8	25
11.84	32	72		11.84	29
11.88	43	83		11.88	32
11.92	39	79		11.92	28
11.96	34	74		11.96	28
12	49	89		12	40
12.04	52	92		12.04	32
12.08	57	97		12.08	47
12.12	45	85		12.12	37
12.16	40	80		12.16	31
12.2	41	81		12.2	34
12.24	34	74		12.24	29
12.28	44	84		12.28	26
12.32	36	76		12.32	27
12.36	34	74		12.36	30
12.4	53	93		12.4	38
12.44	45	85		12.44	31
12.48	68	108		12.48	43
12.52	42	82		12.52	32
12.56	42	82		12.56	30
12.6	51	91		12.6	36
12.64	39	79		12.64	36
12.68	41	81		12.68	34
12.72	46	86		12.72	36
12.76	43	83		12.76	31
12.8	40	80		12.8	32
12.84	30	70		12.84	26
12.88	39	79		12.88	29
12.92	43	83		12.92	30
12.96	43	83		12.96	38
13	29	69		13	28
13.04	39	79		13.04	27
13.08	44	84		13.08	32
13.12	42	82		13.12	33
13.16	51	91		13.16	40
13.2	36	76		13.2	31
13.24	55	95		13.24	34
13.28	46	86		13.28	35
13.32	45	85		13.32	33
13.36	56	96		13.36	39
13.4	49	89		13.4	38
13.44	49	89		13.44	39
13.48	58	98		13.48	31
13.52	43	83		13.52	33
13.56	53	93		13.56	41
13.6	46	86		13.6	32
13.64	59	99		13.64	44
13.68	49	89		13.68	40
13.72	39	79		13.72	31
13.76	57	97		13.76	43
13.8	55	95		13.8	43
13.84	46	86		13.84	36
13.88	61	101		13.88	47
13.92	62	102		13.92	49
13.96	42	82		13.96	38
14	60	100		14	47
14.04	51	91		14.04	41
14.08	68	108		14.08	51
14.12	48	88		14.12	35
14.16	42	82		14.16	46
14.2	67	107		14.2	53
14.24	64	104		14.24	51
14.28	59	99		14.28	46
14.32	61	101		14.32	47
14.36	82	122		14.36	61
14.4	70	110		14.4	54
14.44	57	97		14.44	45
14.48	73	113		14.48	53
14.52	61	101		14.52	47
14.56	66	106		14.56	48
14.6	49	89		14.6	42
14.64	80	120		14.64	56
14.68	72	112		14.68	53
14.72	72	112		14.72	51
14.76	78	118		14.76	51
14.8	68	108		14.8	50
14.84	70	110		14.84	48
14.88	57	97		14.88	41
14.92	66	106		14.92	54
14.96	70	110		14.96	54
15	76	116		15	59
15.04	66	106		15.04	53
15.08	65	105		15.08	52
15.12	65	105		15.12	48
15.16	58	98		15.16	43
15.2	62	102		15.2	46
15.24	78	118		15.24	61
15.28	66	106		15.28	46
15.32	69	109		15.32	49
15.36	82	122		15.36	60
15.4	88	128		15.4	60
15.44	67	107		15.44	50
15.48	61	101		15.48	48
15.52	64	104		15.52	45
15.56	56	96		15.56	40
15.6	69	109		15.6	53
15.64	52	92		15.64	40
15.68	83	123		15.68	55
15.72	81	121		15.72	58
15.76	66	106		15.76	58
15.8	80	120		15.8	56
15.84	49	89		15.84	44
15.88	73	113		15.88	56
15.92	64	104		15.92	51
15.96	64	104		15.96	48
16	73	113		16	61
16.04	73	113		16.04	60
16.08	73	113		16.08	56
16.12	84	124		16.12	56
16.16	81	121		16.16	56
16.2	80	120		16.2	57
16.24	84	124		16.24	68
16.28	62	102		16.28	49
16.32	76	116		16.32	62
16.36	84	124		16.36	64
16.4	85	125		16.4	62
16.44	73	113		16.44	59
16.48	88	128		16.48	64
16.52	94	134		16.52	73
16.56	80	120		16.56	65
16.6	77	117		16.6	63
16.64	77	117		16.64	58
16.68	96	136		16.68	75
16.72	85	125		16.72	65
16.76	100	140		16.76	73
16.8	115	155		16.8	85
16.84	96	136		16.84	74
16.88	89	129		16.88	68
16.92	98	138		16.92	78
16.96	94	134		16.96	69
17	108	148		17	78
17.04	96	136		17.04	76
17.08	91	131		17.08	69
17.12	106	146		17.12	74
17.16	88	128		17.16	71
17.2	106	146		17.2	78
17.24	110	150		17.24	85
17.28	76	116		17.28	64
17.32	122	162		17.32	88
17.36	117	157		17.36	84
17.4	78	118		17.4	73
17.44	112	152		17.44	83
17.48	114	154		17.48	77
17.52	96	136		17.52	72
17.56	87	127		17.56	63
17.6	117	157		17.6	86
17.64	98	138		17.64	73
17.68	96	136		17.68	73
17.72	104	144		17.72	73
17.76	90	130		17.76	67
17.8	85	125		17.8	69
17.84	92	132		17.84	67
17.88	98	138		17.88	74
17.92	75	115		17.92	60
17.96	81	121		17.96	60
18	104	144		18	61
18.04	110	150		18.04	73
18.08	96	136		18.08	66
18.12	80	120		18.12	62
18.16	87	127		18.16	64
18.2	97	137		18.2	65
18.24	82	122		18.24	55
18.28	71	111		18.28	58
18.32	97	137		18.32	61
18.36	91	131		18.36	71
18.4	70	110		18.4	47
18.44	64	104		18.44	46
18.48	101	141		18.48	68
18.52	57	97		18.52	44
18.56	69	109		18.56	52
18.6	73	113		18.6	54
18.64	54	94		18.64	44
18.68	72	112		18.68	52
18.72	86	126		18.72	57
18.76	76	116		18.76	49
18.8	81	121		18.8	61
18.84	54	94		18.84	39
18.88	78	118		18.88	55
18.92	75	115		18.92	57
18.96	56	96		18.96	38
19	72	112		19	54
19.04	77	117		19.04	55
19.08	67	107		19.08	48
19.12	62	102		19.12	49
19.16	77	117		19.16	53
19.2	64	104		19.2	46
19.24	75	115		19.24	58
19.28	64	104		19.28	51
19.32	65	105		19.32	49
19.36	73	113		19.36	53
19.4	76	116		19.4	57
19.44	65	105		19.44	45
19.48	69	109		19.48	51
19.52	66	106		19.52	45
19.56	67	107		19.56	55
19.6	96	136		19.6	66
19.64	66	106		19.64	50
19.68	84	124		19.68	52
19.72	77	117		19.72	51
19.76	68	108		19.76	52
19.8	83	123		19.8	56
19.84	84	124		19.84	62
19.88	86	126		19.88	57
19.92	83	123		19.92	58
19.96	66	106		19.96	44
20	83	123		20	50
20.04	66	106		20.04	45
20.08	66	106		20.08	46
20.12	80	120		20.12	57
20.16	80	120		20.16	51
20.2	71	111		20.2	54
20.24	77	117		20.24	52
20.28	75	115		20.28	55
20.32	85	125		20.32	57
20.36	72	112		20.36	55
20.4	72	112		20.4	48
20.44	71	111		20.44	48
20.48	73	113		20.48	47
20.52	59	99		20.52	45
20.56	60	100		20.56	46
20.6	81	121		20.6	52
20.64	66	106		20.64	45
20.68	65	105		20.68	52
20.72	87	127		20.72	62
20.76	72	112		20.76	54
20.8	70	110		20.8	48
20.84	75	115		20.84	48
20.88	73	113		20.88	50
20.92	64	104		20.92	50
20.96	68	108		20.96	45
21	70	110		21	46
21.04	77	117		21.04	52
21.08	72	112		21.08	47
21.12	72	112		21.12	52
21.16	70	110		21.16	50
21.2	78	118		21.2	54
21.24	69	109		21.24	51
21.28	74	114		21.28	54
21.32	69	109		21.32	52
21.36	77	117		21.36	50
21.4	78	118		21.4	60
21.44	80	120		21.44	55
21.48	90	130		21.48	58
21.52	77	117		21.52	57
21.56	68	108		21.56	50
21.6	75	115		21.6	55
21.64	59	99		21.64	44
21.68	70	110		21.68	50
21.72	51	91		21.72	51
21.76	82	122		21.76	54
21.8	99	139		21.8	71
21.84	80	120		21.84	66
21.88	82	122		21.88	54
21.92	83	123		21.92	51
21.96	75	115		21.96	51
22	88	128		22	57
22.04	80	120		22.04	56
22.08	88	128		22.08	62
22.12	81	121		22.12	56
22.16	87	127		22.16	65
22.2	81	121		22.2	60
22.24	93	133		22.24	56
22.28	92	132		22.28	61
22.32	104	144		22.32	67
22.36	71	111		22.36	59
22.4	88	128		22.4	65
22.44	88	128		22.44	65
22.48	82	122		22.48	58
22.52	93	133		22.52	61
22.56	73	113		22.56	53
22.6	57	97		22.6	42
22.64	88	128		22.64	56
22.68	84	124		22.68	66
22.72	87	127		22.72	57
22.76	80	120		22.76	58
22.8	83	123		22.8	58
22.84	81	121		22.84	51
22.88	70	110		22.88	49
22.92	93	133		22.92	58
22.96	69	109		22.96	53
23	80	120		23	52
23.04	64	104		23.04	49
23.08	67	107		23.08	42
23.12	83	123		23.12	54
23.16	94	134		23.16	63
23.2	71	111		23.2	43
23.24	74	114		23.24	51
23.28	70	110		23.28	53
23.32	84	124		23.32	54
23.36	67	107		23.36	43
23.4	72	112		23.4	51
23.44	80	120		23.44	50
23.48	90	130		23.48	55
23.52	67	107		23.52	48
23.56	65	105		23.56	49
23.6	70	110		23.6	51
23.64	78	118		23.64	55
23.68	87	127		23.68	60
23.72	86	126		23.72	60
23.76	77	117		23.76	47
23.8	74	114		23.8	51
23.84	74	114		23.84	49
23.88	90	130		23.88	60
23.92	94	134		23.92	63
23.96	77	117		23.96	53
24	82	122		24	54
24.04	87	127		24.04	53
24.08	78	118		24.08	52
24.12	75	115		24.12	52
24.16	80	120		24.16	54
24.2	71	111		24.2	52
24.24	80	120		24.24	51
24.28	80	120		24.28	51
24.32	83	123		24.32	50
24.36	65	105		24.36	50
24.4	80	120		24.4	50
24.44	90	130		24.44	58
24.48	71	111		24.48	46
24.52	80	120		24.52	52
24.56	80	120		24.56	55
24.6	62	102		24.6	45
24.64	81	121		24.64	48
24.68	66	106		24.68	49
24.72	65	105		24.72	46
24.76	72	112		24.76	51
24.8	101	141		24.8	56
24.84	64	104		24.84	41
24.88	62	102		24.88	39
24.92	67	107		24.92	38
24.96	71	111		24.96	48
25	59	99		25	39
25.04	53	93		25.04	36
25.08	65	105		25.08	39
25.12	49	89		25.12	33
25.16	55	95		25.16	32
25.2	52	92		25.2	31
25.24	56	96		25.24	41
25.28	53	93		25.28	34
25.32	64	104		25.32	40
25.36	52	92		25.36	33
25.4	57	97		25.4	36
25.44	59	99		25.44	38
25.48	67	107		25.48	40
25.52	59	99		25.52	34
25.56	70	110		25.56	38
25.6	48	88		25.6	36
25.64	71	111		25.64	46
25.68	50	90		25.68	34
25.72	69	109		25.72	40
25.76	65	105		25.76	46
25.8	69	109		25.8	40
25.84	64	104		25.84	45
25.88	64	104		25.88	36
25.92	58	98		25.92	41
25.96	61	101		25.96	33
26	69	109		26	41
26.04	64	104		26.04	42
26.08	66	106		26.08	41
26.12	75	115		26.12	46
26.16	56	96		26.16	37
26.2	57	97		26.2	34
26.24	46	86		26.24	29
26.28	57	97		26.28	37
26.32	62	102		26.32	35
26.36	60	100		26.36	36
26.4	57	97		26.4	38
26.44	64	104		26.44	40
26.48	57	97		26.48	37
26.52	55	95		26.52	33
26.56	52	92		26.56	33
26.6	53	93		26.6	36
26.64	81	121		26.64	45
26.68	60	100		26.68	39
26.72	55	95		26.72	37
26.76	65	105		26.76	38
26.8	43	83		26.8	33
26.84	60	100		26.84	41
26.88	58	98		26.88	39
26.92	64	104		26.92	36
26.96	44	84		26.96	29
27	48	88		27	30
27.04	68	108		27.04	39
27.08	50	90		27.08	34
27.12	48	88		27.12	33
27.16	38	78		27.16	20
27.2	56	96		27.2	30
27.24	61	101		27.24	37
27.28	43	83		27.28	23
27.32	46	86		27.32	32
27.36	61	101		27.36	39
27.4	58	98		27.4	34
27.44	56	96		27.44	32
27.48	55	95		27.48	32
27.52	52	92		27.52	32
27.56	64	104		27.56	38
27.6	52	92		27.6	31
27.64	50	90		27.64	30
27.68	69	109		27.68	41
27.72	52	92		27.72	30
27.76	52	92		27.76	32
27.8	48	88		27.8	33
27.84	64	104		27.84	39
27.88	57	97		27.88	32
27.92	71	111		27.92	46
27.96	48	88		27.96	28
28	59	99		28	35
28.04	57	97		28.04	31
28.08	49	89		28.08	32
28.12	44	84		28.12	25
28.16	51	91		28.16	28
28.2	54	94		28.2	32
28.24	44	84		28.24	26
28.28	64	104		28.28	32
28.32	54	94		28.32	34
28.36	61	101		28.36	35
28.4	45	85		28.4	29
28.44	48	88		28.44	37
28.48	58	98		28.48	31
28.52	55	95		28.52	31
28.56	48	88		28.56	35
28.6	68	108		28.6	41
28.64	59	99		28.64	35
28.68	61	101		28.68	38
28.72	48	88		28.72	32
28.76	59	99		28.76	37
28.8	60	100		28.8	38
28.84	48	88		28.84	32
28.88	56	96		28.88	36
28.92	61	101		28.92	39
28.96	61	101		28.96	39
29	41	81		29	23
29.04	59	99		29.04	41
29.08	54	94		29.08	40
29.12	50	90		29.12	30
29.16	56	96		29.16	35
29.2	46	86		29.2	29
29.24	40	80		29.24	24
29.28	45	85		29.28	29
29.32	65	105		29.32	38
29.36	59	99		29.36	33
29.4	64	104		29.4	43
29.44	65	105		29.44	37
29.48	58	98		29.48	31
29.52	52	92		29.52	30
29.56	49	89		29.56	30
29.6	42	82		29.6	22
29.64	61	101		29.64	42
29.68	77	117		29.68	46
29.72	68	108		29.72	38
29.76	87	127		29.76	48
29.8	70	110		29.8	37
29.84	57	97		29.84	35
29.88	87	127		29.88	50
29.92	90	130		29.92	51
29.96	81	121		29.96	43
30	76	116		30	42
30.04	70	110		30.04	40
30.08	62	102		30.08	36
30.12	69	109		30.12	35
30.16	65	105		30.16	39
30.2	83	123		30.2	47
30.24	57	97		30.24	37
30.28	72	112		30.28	39
30.32	58	98		30.32	35
30.36	72	112		30.36	45
30.4	48	88		30.4	36
30.44	58	98		30.44	35
30.48	64	104		30.48	35
30.52	72	112		30.52	40
30.56	58	98		30.56	37
30.6	60	100		30.6	31
30.64	48	88		30.64	35
30.68	60	100		30.68	38
30.72	55	95		30.72	31
30.76	64	104		30.76	39
30.8	76	116		30.8	45
30.84	64	104		30.84	39
30.88	69	109		30.88	37
30.92	51	91		30.92	30
30.96	59	99		30.96	34
31	52	92		31	36
31.04	52	92		31.04	34
31.08	69	109		31.08	38
31.12	64	104		31.12	37
31.16	61	101		31.16	36
31.2	62	102		31.2	36
31.24	73	113		31.24	41
31.28	54	94		31.28	27
31.32	69	109		31.32	40
31.36	59	99		31.36	31
31.4	80	120		31.4	48
31.44	51	91		31.44	39
31.48	51	91		31.48	29
31.52	50	90		31.52	34
31.56	56	96		31.56	37
31.6	56	96		31.6	35
31.64	75	115		31.64	42
31.68	58	98		31.68	37
31.72	60	100		31.72	35
31.76	54	94		31.76	32
31.8	66	106		31.8	38
31.84	72	112		31.84	41
31.88	51	91		31.88	36
31.92	41	81		31.92	26
31.96	40	80		31.96	24
32	70	110		32	41
32.04	61	101		32.04	35
32.08	50	90		32.08	28
32.12	56	96		32.12	35
32.16	86	126		32.16	50
32.2	54	94		32.2	35
32.24	59	99		32.24	36
32.28	80	120		32.28	45
32.32	56	96		32.32	35
32.36	42	82		32.36	28
32.4	70	110		32.4	42
32.44	49	89		32.44	28
32.48	83	123		32.48	47
32.52	84	124		32.52	47
32.56	66	106		32.56	33
32.6	49	89		32.6	33
32.64	65	105		32.64	41
32.68	60	100		32.68	33
32.72	74	114		32.72	41
32.76	75	115		32.76	45
32.8	66	106		32.8	40
32.84	71	111		32.84	40
32.88	64	104		32.88	36
32.92	55	95		32.92	31
32.96	58	98		32.96	33
33	68	108		33	39
33.04	45	85		33.04	26
33.08	64	104		33.08	37
33.12	66	106		33.12	43
33.16	68	108		33.16	36
33.2	76	116		33.2	42
33.24	58	98		33.24	31
33.28	58	98		33.28	32
33.32	72	112		33.32	40
33.36	72	112		33.36	38
33.4	60	100		33.4	41
33.44	84	124		33.44	46
33.48	54	94		33.48	30
33.52	49	89		33.52	37
33.56	59	99		33.56	42
33.6	44	84		33.6	26
33.64	55	95		33.64	29
33.68	73	113		33.68	43
33.72	60	100		33.72	37
33.76	80	120		33.76	49
33.8	73	113		33.8	40
33.84	73	113		33.84	39
33.88	55	95		33.88	34
33.92	78	118		33.92	50
33.96	64	104		33.96	40
34	72	112		34	41
34.04	64	104		34.04	37
34.08	64	104		34.08	35
34.12	48	88		34.12	30
34.16	61	101		34.16	37
34.2	68	108		34.2	38
34.24	69	109		34.24	44
34.28	76	116		34.28	45
34.32	58	98		34.32	36
34.36	66	106		34.36	42
34.4	67	107		34.4	40
34.44	60	100		34.44	34
34.48	74	114		34.48	44
34.52	50	90		34.52	31
34.56	59	99		34.56	34
34.6	78	118		34.6	45
34.64	57	97		34.64	34
34.68	73	113		34.68	47
34.72	61	101		34.72	35
34.76	66	106		34.76	37
34.8	87	127		34.8	51
34.84	77	117		34.84	43
34.88	84	124		34.88	47
34.92	92	132		34.92	50
34.96	87	127		34.96	48
35	112	152		35	63
35.04	90	130		35.04	50
35.08	141	181		35.08	80
35.12	122	162		35.12	69
35.16	133	173		35.16	69
35.2	126	166		35.2	68
35.24	156	196		35.24	86
35.28	158	198		35.28	82
35.32	174	214		35.32	92
35.36	153	193		35.36	83
35.4	154	194		35.4	85
35.44	168	208		35.44	87
35.48	176	216		35.48	95
35.52	179	219		35.52	94
35.56	163	203		35.56	86
35.6	156	196		35.6	83
35.64	116	156		35.64	64
35.68	99	139		35.68	59
35.72	86	126		35.72	45
35.76	71	111		35.76	38
35.8	74	114		35.8	40
35.84	77	117		35.84	41
35.88	70	110		35.88	40
35.92	61	101		35.92	33
35.96	72	112		35.96	40
36	61	101		36	37
36.04	75	115		36.04	42
36.08	69	109		36.08	45
36.12	68	108		36.12	41
36.16	66	106		36.16	38
36.2	56	96		36.2	32
36.24	73	113		36.24	45
36.28	66	106		36.28	39
36.32	53	93		36.32	28
36.36	56	96		36.36	28
36.4	59	99		36.4	38
36.44	54	94		36.44	29
36.48	61	101		36.48	33
36.52	61	101		36.52	36
36.56	65	105		36.56	38
36.6	48	88		36.6	31
36.64	51	91		36.64	30
36.68	60	100		36.68	37
36.72	62	102		36.72	37
36.76	71	111		36.76	38
36.8	48	88		36.8	31
36.84	71	111		36.84	41
36.88	66	106		36.88	35
36.92	72	112		36.92	40
36.96	55	95		36.96	31
37	59	99		37	36
37.04	68	108		37.04	36
37.08	54	94		37.08	30
37.12	55	95		37.12	30
37.16	78	118		37.16	42
37.2	62	102		37.2	35
37.24	60	100		37.24	33
37.28	50	90		37.28	31
37.32	49	89		37.32	39
37.36	43	83		37.36	43
37.4	71	111		37.4	49
37.44	39	79		37.44	46
37.48	62	102		37.48	41
37.52	57	97		37.52	32
37.56	62	102		37.56	36
37.6	67	107		37.6	37
37.64	56	96		37.64	34
37.68	37	77		37.68	24
37.72	55	95		37.72	31
37.76	52	92		37.76	29
37.8	60	100		37.8	37
37.84	62	102		37.84	33
37.88	61	101		37.88	35
37.92	48	88		37.92	29
37.96	49	89		37.96	30
38	58	98		38	41
38.04	61	101		38.04	34
38.08	60	100		38.08	36
38.12	60	100		38.12	34
38.16	50	90		38.16	25
38.2	42	82		38.2	23
38.24	59	99		38.24	33
38.28	59	99		38.28	35
38.32	54	94		38.32	31
38.36	58	98		38.36	36
38.4	56	96		38.4	35
38.44	53	93		38.44	32
38.48	69	109		38.48	39
38.52	73	113		38.52	38
38.56	78	118		38.56	42
38.6	89	129		38.6	49
38.64	74	114		38.64	40
38.68	80	120		38.68	45
38.72	120	160		38.72	62
38.76	100	140		38.76	51
38.8	102	142		38.8	53
38.84	119	159		38.84	64
38.88	96	136		38.88	53
38.92	76	116		38.92	40
38.96	96	136		38.96	52
39	93	133		39	50
39.04	78	118		39.04	41
39.08	59	99		39.08	38
39.12	64	104		39.12	35
39.16	65	105		39.16	38
39.2	43	83		39.2	24
39.24	61	101		39.24	38
39.28	51	91		39.28	27
39.32	64	104		39.32	36
39.36	28	68		39.36	18
39.4	36	76		39.4	22
39.44	46	86		39.44	27
39.48	45	85		39.48	26
39.52	54	94		39.52	33
39.56	36	76		39.56	24
39.6	50	90		39.6	35
39.64	48	88		39.64	29
39.68	71	111		39.68	38
39.72	38	78		39.72	20
39.76	42	82		39.76	24
39.8	38	78		39.8	26
39.84	60	100		39.84	35
39.88	40	80		39.88	27
39.92	48	88		39.92	27
39.96	53	93		39.96	27
40	32	72		40	22
40.04	45	85		40.04	25
40.08	48	88		40.08	28
40.12	37	77		40.12	29
40.16	50	90		40.16	32
40.2	42	82		40.2	25
40.24	52	92		40.24	32
40.28	48	88		40.28	28
40.32	55	95		40.32	30
40.36	30	70		40.36	22
40.4	49	89		40.4	30
40.44	46	86		40.44	27
40.48	42	82		40.48	25
40.52	44	84		40.52	28
40.56	43	83		40.56	25
40.6	51	91		40.6	26
40.64	42	82		40.64	26
40.68	58	98		40.68	35
40.72	52	92		40.72	28
40.76	46	86		40.76	27
40.8	43	83		40.8	22
40.84	41	81		40.84	24
40.88	54	94		40.88	33
40.92	40	80		40.92	26
40.96	32	72		40.96	18
41	42	82		41	24
41.04	43	83		41.04	25
41.08	43	83		41.08	26
41.12	48	88		41.12	25
41.16	29	69		41.16	20
41.2	38	78		41.2	25
41.24	48	88		41.24	32
41.28	40	80		41.28	26
41.32	55	95		41.32	28
41.36	35	75		41.36	22
41.4	23	63		41.4	15
41.44	39	79		41.44	24
41.48	42	82		41.48	27
41.52	46	86		41.52	30
41.56	44	84		41.56	23
41.6	39	79		41.6	24
41.64	44	84		41.64	23
41.68	46	86		41.68	23
41.72	37	77		41.72	23
41.76	36	76		41.76	20
41.8	48	88		41.8	25
41.84	34	74		41.84	17
41.88	43	83		41.88	27
41.92	48	88		41.92	25
41.96	37	77		41.96	21
42	59	99		42	31
42.04	39	79		42.04	22
42.08	25	65		42.08	13
42.12	46	86		42.12	24
42.16	46	86		42.16	23
42.2	32	72		42.2	19
42.24	52	92		42.24	33
42.28	49	89		42.28	31
42.32	57	97		42.32	31
42.36	49	89		42.36	31
42.4	36	76		42.4	22
42.44	61	101		42.44	32
42.48	33	73		42.48	22
42.52	49	89		42.52	31
42.56	53	93		42.56	29
42.6	54	94		42.6	32
42.64	61	101		42.64	32
42.68	65	105		42.68	36
42.72	39	79		42.72	21
42.76	44	84		42.76	23
42.8	49	89		42.8	27
42.84	56	96		42.84	31
42.88	64	104		42.88	33
42.92	61	101		42.92	34
42.96	58	98		42.96	33
43	65	105		43	35
43.04	65	105		43.04	33
43.08	54	94		43.08	28
43.12	43	83		43.12	22
43.16	52	92		43.16	29
43.2	44	84		43.2	24
43.24	40	80		43.24	21
43.28	45	85		43.28	32
43.32	39	79		43.32	20
43.36	48	88		43.36	26
43.4	29	69		43.4	19
43.44	39	79		43.44	26
43.48	41	81		43.48	24
43.52	38	78		43.52	22
43.56	38	78		43.56	26
43.6	37	77		43.6	20
43.64	39	79		43.64	21
43.68	30	70		43.68	16
43.72	45	85		43.72	30
43.76	38	78		43.76	19
43.8	52	92		43.8	27
43.84	48	88		43.84	25
43.88	41	81		43.88	21
43.92	39	79		43.92	20
43.96	48	88		43.96	26
44	48	88		44	24
44.04	48	88		44.04	27
44.08	23	63		44.08	15
44.12	39	79		44.12	21
44.16	36	76		44.16	20
44.2	48	88		44.2	24
44.24	45	85		44.24	24
44.28	48	88		44.28	26
44.32	50	90		44.32	27
44.36	50	90		44.36	29
44.4	28	68		44.4	19
44.44	38	78		44.44	26
44.48	35	75		44.48	19
44.52	29	69		44.52	16
44.56	30	70		44.56	18
44.6	29	69		44.6	17
44.64	40	80		44.64	23
44.68	26	66		44.68	19
44.72	35	75		44.72	22
44.76	41	81		44.76	22
44.8	29	69		44.8	19
44.84	45	85		44.84	24
44.88	36	76		44.88	20
44.92	45	85		44.92	29
44.96	38	78		44.96	22
45	44	84		45	24
45.04	37	77		45.04	23
45.08	37	77		45.08	21
45.12	44	84		45.12	27
45.16	37	77		45.16	22
45.2	35	75		45.2	18
45.24	34	74		45.24	20
45.28	38	78		45.28	22
45.32	39	79		45.32	21
45.36	48	88		45.36	31
45.4	38	78		45.4	23
45.44	35	75		45.44	23
45.48	37	77		45.48	24
45.52	43	83		45.52	27
45.56	32	72		45.56	25
45.6	34	74		45.6	20
45.64	32	72		45.64	16
45.68	33	73		45.68	20
45.72	32	72		45.72	23
45.76	33	73		45.76	24
45.8	38	78		45.8	19
45.84	29	69		45.84	15
45.88	33	73		45.88	19
45.92	26	66		45.92	19
45.96	50	90		45.96	26
46	22	62		46	12
46.04	30	70		46.04	17
46.08	37	77		46.08	19
46.12	36	76		46.12	18
46.16	36	76		46.16	24
46.2	38	78		46.2	20
46.24	41	81		46.24	24
46.28	32	72		46.28	20
46.32	34	74		46.32	20
46.36	48	88		46.36	31
46.4	36	76		46.4	19
46.44	36	76		46.44	20
46.48	29	69		46.48	15
46.52	33	73		46.52	25
46.56	26	66		46.56	16
46.6	48	88		46.6	31
46.64	40	80		46.64	22
46.68	48	88		46.68	30
46.72	28	68		46.72	14
46.76	35	75		46.76	24
46.8	21	61		46.8	13
46.84	35	75		46.84	18
46.88	40	80		46.88	22
46.92	32	72		46.92	18
46.96	33	73		46.96	19
47	37	77		47	20
47.04	53	93		47.04	35
47.08	35	75		47.08	21
47.12	39	79		47.12	26
47.16	37	77		47.16	24
47.2	40	80		47.2	21
47.24	29	69		47.24	16
47.28	32	72		47.28	16
47.32	43	83		47.32	25
47.36	37	77		47.36	24
47.4	30	70		47.4	22
47.44	39	79		47.44	20
47.48	27	67		47.48	18
47.52	29	69		47.52	16
47.56	27	67		47.56	17
47.6	46	86		47.6	29
47.64	42	82		47.64	23
47.68	39	79		47.68	21
47.72	34	74		47.72	18
47.76	46	86		47.76	26
47.8	40	80		47.8	22
47.84	33	73		47.84	23
47.88	34	74		47.88	24
47.92	41	81		47.92	28
47.96	39	79		47.96	27
48	46	86		48	25
48.04	24	64		48.04	15
48.08	33	73		48.08	22
48.12	36	76		48.12	19
48.16	40	80		48.16	27
48.2	38	78		48.2	22
48.24	44	84		48.24	23
48.28	22	62		48.28	14
48.32	28	68		48.32	14
48.36	48	88		48.36	31
48.4	32	72		48.4	17
48.44	49	89		48.44	27
48.48	34	74		48.48	24
48.52	26	66		48.52	17
48.56	21	61		48.56	13
48.6	48	88		48.6	28
48.64	36	76		48.64	23
48.68	39	79		48.68	21
48.72	48	88		48.72	30
48.76	53	93		48.76	28
48.8	51	91		48.8	29
48.84	34	74		48.84	24
48.88	35	75		48.88	20
48.92	41	81		48.92	28
48.96	50	90		48.96	26
49	37	77		49	26
49.04	33	73		49.04	18
49.08	49	89		49.08	28
49.12	32	72		49.12	19
49.16	37	77		49.16	19
49.2	25	65		49.2	20
49.24	33	73		49.24	19
49.28	22	62		49.28	14
49.32	29	69		49.32	15
49.36	32	72		49.36	18
49.4	26	66		49.4	13
49.44	32	72		49.44	17
49.48	28	68		49.48	20
49.52	41	81		49.52	28
49.56	42	82		49.56	24
49.6	20	60		49.6	11
49.64	23	63		49.64	12
49.68	45	85		49.68	29
49.72	27	67		49.72	15
49.76	18	58		49.76	9
49.8	33	73		49.8	18
49.84	32	72		49.84	19
49.88	36	76		49.88	19
49.92	32	72		49.92	17
49.96	44	84		49.96	25
50	37	77		50	23
50.04	25	65		50.04	13
50.08	35	75		50.08	18
50.12	27	67		50.12	18
50.16	29	69		50.16	18
50.2	20	60		50.2	16
50.24	37	77		50.24	21
50.28	35	75		50.28	19
50.32	40	80		50.32	22
50.36	20	60		50.36	14
50.4	28	68		50.4	14
50.44	27	67		50.44	21
50.48	37	77		50.48	24
50.52	20	60		50.52	11
50.56	32	72		50.56	18
50.6	29	69		50.6	15
50.64	23	63		50.64	18
50.68	30	70		50.68	22
50.72	23	63		50.72	19
50.76	26	66		50.76	18
50.8	14	54		50.8	14
50.84	28	68		50.84	14
50.88	32	72		50.88	16
50.92	25	65		50.92	13
50.96	29	69		50.96	15
51	19	59		51	16
51.04	22	62		51.04	14
51.08	34	74		51.08	17
51.12	24	64		51.12	14
51.16	26	66		51.16	14
51.2	22	62		51.2	14
51.24	19	59		51.24	12
51.28	35	75		51.28	19
51.32	34	74		51.32	23
51.36	33	73		51.36	21
51.4	16	56		51.4	11
51.44	33	73		51.44	23
51.48	29	69		51.48	20
51.52	27	67		51.52	14
51.56	21	61		51.56	14
51.6	20	60		51.6	10
51.64	27	67		51.64	17
51.68	27	67		51.68	20
51.72	18	58		51.72	11
51.76	26	66		51.76	17
51.8	20	60		51.8	15
51.84	28	68		51.84	16
51.88	27	67		51.88	13
51.92	27	67		51.92	18
51.96	39	79		51.96	15
52	22	62		52	17
52.04	33	73		52.04	14
52.08	25	65		52.08	15
52.12	19	59		52.12	10
52.16	39	79		52.16	15
52.2	22	62		52.2	14
52.24	23	63		52.24	12
52.28	26	66		52.28	13
52.32	23	63		52.32	17
52.36	36	76		52.36	18
52.4	27	67		52.4	17
52.44	23	63		52.44	21
52.48	27	67		52.48	19
52.52	26	66		52.52	19
52.56	20	60		52.56	16
52.6	41	81		52.6	17
52.64	27	67		52.64	12
52.68	17	57		52.68	16
52.72	16	56		52.72	14
52.76	25	65		52.76	17
52.8	24	64		52.8	13
52.84	27	67		52.84	16
52.88	30	70		52.88	17
52.92	25	65		52.92	19
52.96	27	67		52.96	11
53	26	66		53	17
53.04	38	78		53.04	12
53.08	38	78		53.08	18
53.12	34	74		53.12	17
53.16	30	70		53.16	23
53.2	25	65		53.2	11
53.24	28	68		53.24	9
53.28	26	66		53.28	20
53.32	38	78		53.32	22
53.36	34	74		53.36	25
53.4	38	78		53.4	26
53.44	25	65		53.44	27
53.48	40	80		53.48	23
53.52	34	74		53.52	24
53.56	28	68		53.56	20
53.6	12	52		53.6	12
53.64	29	69		53.64	20
53.68	19	59		53.68	16
53.72	18	58		53.72	16
53.76	40	80		53.76	20
53.8	23	63		53.8	12
53.84	30	70		53.84	20
53.88	20	60		53.88	16
53.92	20	60		53.92	14
53.96	21	61		53.96	18
54	27	67		54	21
54.04	21	61		54.04	17
54.08	20	60		54.08	16
54.12	18	58		54.12	9
54.16	16	56		54.16	15
54.2	18	58		54.2	15
54.24	20	60		54.24	17
54.28	21	61		54.28	16
54.32	23	63		54.32	18
54.36	19	59		54.36	10
54.4	19	59		54.4	13
54.44	30	70		54.44	21
54.48	6	46		54.48	10
54.52	17	57		54.52	16
54.56	29	69		54.56	20
54.6	18	58		54.6	15
54.64	16	56		54.64	14
54.68	27	67		54.68	20
54.72	22	62		54.72	16
54.76	16	56		54.76	13
54.8	20	60		54.8	13
54.84	25	65		54.84	14
54.88	18	58		54.88	14
54.92	19	59		54.92	17
54.96	23	63		54.96	16
55	26	66		55	19
55.04	20	60		55.04	17
55.08	25	65		55.08	13
55.12	24	64		55.12	18
55.16	14	54		55.16	11
55.2	16	56		55.2	8
55.24	16	56		55.24	12
55.28	28	68		55.28	15
55.32	13	53		55.32	7
55.36	13	53		55.36	7
55.4	16	56		55.4	15
55.44	6	46		55.44	8
55.48	16	56		55.48	14
55.52	32	72		55.52	22
55.56	21	61		55.56	12
55.6	13	53		55.6	7
55.64	19	59		55.64	16
55.68	23	63		55.68	18
55.72	30	70		55.72	22
55.76	21	61		55.76	18
55.8	36	76		55.8	24
55.84	32	72		55.84	16
55.88	16	56		55.88	15
55.92	27	67		55.92	16
55.96	27	67		55.96	19
56	29	69		56	15
56.04	32	72		56.04	16
56.08	8	48		56.08	8
56.12	22	62		56.12	14
56.16	16	56		56.16	15
56.2	25	65		56.2	15
56.24	35	75		56.24	21
56.28	28	68		56.28	19
56.32	35	75		56.32	25
56.36	28	68		56.36	21
56.4	26	66		56.4	20
56.44	35	75		56.44	18
56.48	13	53		56.48	12
56.52	18	58		56.52	9
56.56	35	75		56.56	23
56.6	45	85		56.6	27
56.64	39	79		56.64	26
56.68	40	80		56.68	27
56.72	32	72		56.72	16
56.76	40	80		56.76	26
56.8	40	80		56.8	26
56.84	48	88		56.84	29
56.88	37	77		56.88	26
56.92	25	65		56.92	13
56.96	23	63		56.96	19
57	39	79		57	27
57.04	34	74		57.04	20
57.08	38	78		57.08	23
57.12	21	61		57.12	18
57.16	25	65		57.16	19
57.2	21	61		57.2	18
57.24	27	67		57.24	21
57.28	17	57		57.28	9
57.32	27	67		57.32	18
57.36	23	63		57.36	15
57.4	16	56		57.4	14
57.44	20	60		57.44	17
57.48	25	65		57.48	19
57.52	39	79		57.52	25
57.56	16	56		57.56	14
57.6	17	57		57.6	16
57.64	20	60		57.64	16
57.68	14	54		57.68	14
57.72	23	63		57.72	17
57.76	19	59		57.76	10
57.8	17	57		57.8	13
57.84	16	56		57.84	15
57.88	21	61		57.88	11
57.92	23	63		57.92	14
57.96	19	59		57.96	16
58	27	67		58	18
58.04	35	75		58.04	21
58.08	38	78		58.08	25
58.12	19	59		58.12	17
58.16	24	64		58.16	19
58.2	18	58		58.2	9
58.24	25	65		58.24	19
58.28	30	70		58.28	22
58.32	30	70		58.32	21
58.36	32	72		58.36	21
58.4	25	65		58.4	13
58.44	26	66		58.44	13
58.48	27	67		58.48	18
58.52	32	72		58.52	23
58.56	26	66		58.56	20
58.6	10	50		58.6	9
58.64	22	62		58.64	14
58.68	24	64		58.68	16
58.72	16	56		58.72	13
58.76	17	57		58.76	14
58.8	28	68		58.8	19
58.84	16	56		58.84	8
58.88	25	65		58.88	18
58.92	16	56		58.92	8
58.96	16	56		58.96	8
59	14	54		59	13
59.04	23	63		59.04	12
59.08	22	62		59.08	18
59.12	36	76		59.12	22
59.16	19	59		59.16	15
59.2	25	65		59.2	15
59.24	13	53		59.24	7
59.28	25	65		59.28	13
59.32	13	53		59.32	11
59.36	18	58		59.36	9
59.4	30	70		59.4	15
59.44	19	59		59.44	16
59.48	9	49		59.48	11
59.52	19	59		59.52	16
59.56	26	66		59.56	13
59.6	27	67		59.6	14
59.64	20	60		59.64	16
59.68	10	50		59.68	5
59.72	21	61		59.72	14
59.76	9	49		59.76	12
59.8	16	56		59.8	14
59.84	18	58		59.84	15
59.88	24	64		59.88	12
59.92	20	60		59.92	10
59.96	28	68		59.96	14
60	27	67		60	18
60.04	16	56		60.04	15
60.08	24	64		60.08	19
60.12	25	65		60.12	15
60.16	11	51		60.16	12
60.2	34	74		60.2	23
60.24	10	50		60.24	11
60.28	12	52		60.28	12
60.32	16	56		60.32	15
60.36	22	62		60.36	12
60.4	21	61		60.4	11
60.44	23	63		60.44	19
60.48	23	63		60.48	17
60.52	27	67		60.52	20
60.56	10	50		60.56	11
60.6	18	58		60.6	14
60.64	16	56		60.64	8
60.68	12	52		60.68	9
60.72	24	64		60.72	15
60.76	8	48		60.76	4
60.8	10	50		60.8	10
60.84	17	57		60.84	15
60.88	14	54		60.88	7
60.92	29	69		60.92	16
60.96	12	52		60.96	13
61	16	56		61	14
61.04	21	61		61.04	12
61.08	26	66		61.08	19
61.12	18	58		61.12	16
61.16	23	63		61.16	13
61.2	26	66		61.2	14
61.24	24	64		61.24	13
61.28	28	68		61.28	14
61.32	21	61		61.32	17
61.36	11	51		61.36	11
61.4	16	56		61.4	15
61.44	21	61		61.44	15
61.48	39	79		61.48	26
61.52	21	61		61.52	15
61.56	19	59		61.56	16
61.6	37	77		61.6	23
61.64	20	60		61.64	16
61.68	23	63		61.68	18
61.72	34	74		61.72	24
61.76	29	69		61.76	15
61.8	32	72		61.8	17
61.84	35	75		61.84	18
61.88	32	72		61.88	17
61.92	30	70		61.92	22
61.96	32	72		61.96	19
62	35	75		62	24
62.04	21	61		62.04	17
62.08	34	74		62.08	23
62.12	44	84		62.12	28
62.16	43	83		62.16	27
62.2	48	88		62.2	26
62.24	35	75		62.24	22
62.28	42	82		62.28	21
62.32	42	82		62.32	28
62.36	32	72		62.36	21
62.4	48	88		62.4	25
62.44	43	83		62.44	23
62.48	42	82		62.48	28
62.52	29	69		62.52	19
62.56	42	82		62.56	27
62.6	39	79		62.6	27
62.64	28	68		62.64	19
62.68	21	61		62.68	15
62.72	25	65		62.72	19
62.76	18	58		62.76	9
62.8	30	70		62.8	21
62.84	28	68		62.84	15
62.88	16	56		62.88	8
62.92	17	57		62.92	15
62.96	32	72		62.96	17
63	21	61		63	17
63.04	16	56		63.04	13
63.08	13	53		63.08	7
63.12	10	50		63.12	5
63.16	19	59		63.16	16
63.2	24	64		63.2	13
63.24	11	51		63.24	8
63.28	10	50		63.28	5
63.32	27	67		63.32	15
63.36	16	56		63.36	13
63.4	21	61		63.4	16
63.44	16	56		63.44	14
63.48	23	63		63.48	12
63.52	16	56		63.52	9
63.56	21	61		63.56	11
63.6	20	60		63.6	17
63.64	14	54		63.64	14
63.68	19	59		63.68	16
63.72	16	56		63.72	8
63.76	25	65		63.76	13
63.8	18	58		63.8	14
63.84	17	57		63.84	9
63.88	23	63		63.88	18
63.92	11	51		63.92	12
63.96	18	58		63.96	16
64	14	54		64	8
64.04	18	58		64.04	15
64.08	22	62		64.08	11
64.12	25	65		64.12	13
64.16	32	72		64.16	16
64.2	29	69		64.2	21
64.24	9	49		64.24	10
64.28	7	47		64.28	11
64.32	16	56		64.32	9
64.36	18	58		64.36	15
64.4	17	57		64.4	13
64.44	13	53		64.44	7
64.48	16	56		64.48	8
64.52	19	59		64.52	16
64.56	13	53		64.56	12
64.6	13	53		64.6	7
64.64	12	52		64.64	6
64.68	16	56		64.68	10
64.72	16	56		64.72	15
64.76	13	53		64.76	7
64.8	20	60		64.8	13
64.84	7	47		64.84	5
64.88	9	49		64.88	11
64.92	6	46		64.92	9
64.96	14	54		64.96	12
65	22	62		65	18
65.04	9	49		65.04	10
65.08	20	60		65.08	10
65.12	9	49		65.12	10
65.16	14	54		65.16	7
65.2	17	57		65.2	13
65.24	16	56		65.24	15
65.28	18	58		65.28	14
65.32	14	54		65.32	13
65.36	9	49		65.36	5
65.4	10	50		65.4	12
65.44	16	56		65.44	14
65.48	14	54		65.48	12
65.52	32	72		65.52	16
65.56	11	51		65.56	11
65.6	24	64		65.6	19
65.64	14	54		65.64	11
65.68	9	49		65.68	8
65.72	18	58		65.72	16
65.76	11	51		65.76	11
65.8	19	59		65.8	16
65.84	13	53		65.84	12
65.88	32	72		65.88	18
65.92	18	58		65.92	15
65.96	0	40		65.96	5
66	10	50		66	8
66.04	23	63		66.04	16
66.08	27	67		66.08	20
66.12	29	69		66.12	19
66.16	17	57		66.16	13
66.2	20	60		66.2	16
66.24	22	62		66.24	16
66.28	10	50		66.28	9
66.32	29	69		66.32	19
66.36	24	64		66.36	12
66.4	12	52		66.4	12
66.44	20	60		66.44	16
66.48	14	54		66.48	11
66.52	27	67		66.52	19
66.56	12	52		66.56	12
66.6	17	57		66.6	14
66.64	9	49		66.64	11
66.68	18	58		66.68	16
66.72	16	56		66.72	14
66.76	16	56		66.76	11
66.8	12	52		66.8	9
66.84	13	53		66.84	12
66.88	18	58		66.88	14
66.92	16	56		66.92	11
66.96	11	51		66.96	10
67	11	51		67	6
67.04	11	51		67.04	9
67.08	22	62		67.08	11
67.12	16	56		67.12	14
67.16	3	43		67.16	9
67.2	19	59		67.2	17
67.24	10	50		67.24	6
67.28	17	57		67.28	15
67.32	3	43		67.32	7
67.36	12	52		67.36	11
67.4	17	57		67.4	13
67.44	20	60		67.44	15
67.48	32	72		67.48	16
67.52	13	53		67.52	11
67.56	4	44		67.56	7
67.6	22	62		67.6	15
67.64	11	51		67.64	12
67.68	17	57		67.68	9
67.72	17	57		67.72	13
67.76	12	52		67.76	9
67.8	18	58		67.8	16
67.84	17	57		67.84	13
67.88	11	51		67.88	10
67.92	18	58		67.92	15
67.96	14	54		67.96	8
68	14	54		68	12
68.04	17	57		68.04	15
68.08	29	69		68.08	21
68.12	20	60		68.12	16
68.16	14	54		68.16	14
68.2	16	56		68.2	14
68.24	21	61		68.24	15
68.28	18	58		68.28	15
68.32	21	61		68.32	15
68.36	17	57		68.36	10
68.4	16	56		68.4	11
68.44	5	45		68.44	8
68.48	5	45		68.48	6
68.52	19	59		68.52	14
68.56	14	54		68.56	11
68.6	8	48		68.6	8
68.64	16	56		68.64	8
68.68	5	45		68.68	10
68.72	7	47		68.72	9
68.76	9	49		68.76	9
68.8	23	63		68.8	18
68.84	22	62		68.84	17
68.88	21	61		68.88	14
68.92	12	52		68.92	9
68.96	16	56		68.96	12
69	16	56		69	12
69.04	10	50		69.04	10
69.08	12	52		69.08	13
69.12	21	61		69.12	15
69.16	11	51		69.16	10
69.2	5	45		69.2	9
69.24	9	49		69.24	10
69.28	3	43		69.28	6
69.32	12	52		69.32	13
69.36	6	46		69.36	8
69.4	8	48		69.4	11
69.44	5	45		69.44	8
69.48	9	49		69.48	9
69.52	16	56		69.52	9
69.56	16	56		69.56	13
69.6	5	45		69.6	7
69.64	14	54		69.64	10
69.68	19	59		69.68	14
69.72	7	47		69.72	8
69.76	23	63		69.76	12
69.8	9	49		69.8	7
69.84	12	52		69.84	11
69.88	6	46		69.88	9
69.92	9	49		69.92	9
69.96	12	52		69.96	10
70	12	52		70	9
70.04	14	54		70.04	8
70.08	10	50		70.08	11
70.12	11	51		70.12	10
70.16	12	52		70.16	13
70.2	4	44		70.2	6
70.24	6	46		70.24	9
70.28	16	56		70.28	11
70.32	10	50		70.32	12
70.36	21	61		70.36	16
70.4	9	49		70.4	10
70.44	12	52		70.44	11
70.48	5	45		70.48	3
70.52	0	40		70.52	4
70.56	10	50		70.56	10
70.6	11	51		70.6	10
70.64	8	48		70.64	8
70.68	4	44		70.68	2
70.72	7	47		70.72	4
70.76	9	49		70.76	9
70.8	0	40		70.8	6
70.84	18	58		70.84	16
70.88	16	56		70.88	12
70.92	19	59		70.92	14
70.96	17	57		70.96	14
71	19	59		71	16
71.04	16	56		71.04	12
71.08	13	53		71.08	11
71.12	23	63		71.12	14
71.16	13	53		71.16	12
71.2	10	50		71.2	5
71.24	11	51		71.24	10
71.28	10	50		71.28	10
71.32	24	64		71.32	18
71.36	10	50		71.36	9
71.4	3	43		71.4	8
71.44	7	47		71.44	10
71.48	5	45		71.48	5
71.52	9	49		71.52	9
71.56	13	53		71.56	10
71.6	5	45		71.6	8
71.64	13	53		71.64	12
71.68	6	46		71.68	9
71.72	11	51		71.72	9
71.76	11	51		71.76	10
71.8	18	58		71.8	13
71.84	16	56		71.84	10
71.88	8	48		71.88	9
71.92	19	59		71.92	14
71.96	14	54		71.96	13
72	10	50		72	12
72.04	2	42		72.04	7
72.08	8	48		72.08	10
72.12	12	52		72.12	10
72.16	10	50		72.16	11
72.2	16	56		72.2	8
72.24	7	47		72.24	7
72.28	8	48		72.28	7
72.32	14	54		72.32	13
72.36	7	47		72.36	8
72.4	4	44		72.4	7
72.44	14	54		72.44	12
72.48	16	56		72.48	11
72.52	6	46		72.52	9
72.56	13	53		72.56	10
72.6	16	56		72.6	13
72.64	18	58		72.64	14
72.68	8	48		72.68	8
72.72	12	52		72.72	13
72.76	6	46		72.76	10
72.8	14	54		72.8	14
72.84	9	49		72.84	10
72.88	9	49		72.88	9
72.92	13	53		72.92	7
72.96	13	53		72.96	10
73	16	56		73	11
73.04	13	53		73.04	12
73.08	16	56		73.08	14
73.12	8	48		73.12	10
73.16	26	66		73.16	17
73.2	13	53		73.2	10
73.24	13	53		73.24	12
73.28	16	56		73.28	14
73.32	21	61		73.32	18
73.36	3	43		73.36	7
73.4	16	56		73.4	13
73.44	17	57		73.44	10
73.48	16	56		73.48	14
73.52	17	57		73.52	9
73.56	14	54		73.56	13
73.6	12	52		73.6	10
73.64	21	61		73.64	14
73.68	18	58		73.68	13
73.72	32	72		73.72	20
73.76	25	65		73.76	20
73.8	9	49		73.8	8
73.84	16	56		73.84	14
73.88	14	54		73.88	12
73.92	20	60		73.92	13
73.96	3	43		73.96	5
74	8	48		74	11
74.04	18	58		74.04	11
74.08	9	49		74.08	11
74.12	4	44		74.12	7
74.16	8	48		74.16	4
74.2	10	50		74.2	9
74.24	17	57		74.24	13
74.28	13	53		74.28	13
74.32	14	54		74.32	8
74.36	13	53		74.36	10
74.4	17	57		74.4	12
74.44	19	59		74.44	15
74.48	2	42		74.48	5
74.52	10	50		74.52	11
74.56	16	56		74.56	14
74.6	13	53		74.6	11
74.64	9	49		74.64	8
74.68	17	57		74.68	13
74.72	20	60		74.72	15
74.76	14	54		74.76	11
74.8	14	54		74.8	14
74.84	9	49		74.84	10
74.88	9	49		74.88	5
74.92	16	56		74.92	12
74.96	17	57		74.96	14
75	10	50		75	11
75.04	22	62		75.04	17
75.08	8	48		75.08	10
75.12	9	49		75.12	10
75.16	17	57		75.16	12
75.2	14	54		75.2	11
75.24	17	57		75.24	13
75.28	6	46		75.28	7
75.32	20	60		75.32	16
75.36	14	54		75.36	12
75.4	5	45		75.4	8
75.44	14	54		75.44	14
75.48	7	47		75.48	9
75.52	16	56		75.52	9
75.56	23	63		75.56	17
75.6	7	47		75.6	7
75.64	18	58		75.64	13
75.68	16	56		75.68	11
75.72	6	46		75.72	7
75.76	17	57		75.76	13
75.8	4	44		75.8	5
75.84	4	44		75.84	9
75.88	12	52		75.88	11
75.92	11	51		75.92	8
75.96	2	42		75.96	6
76	17	57		76	15
76.04	7	47		76.04	9
76.08	11	51		76.08	10
76.12	10	50		76.12	8
76.16	4	44		76.16	4
76.2	8	48		76.2	8
76.24	20	60		76.24	15
76.28	3	43		76.28	6
76.32	7	47		76.32	10
76.36	14	54		76.36	13
76.4	9	49		76.4	9
76.44	12	52		76.44	10
76.48	13	53		76.48	12
76.52	8	48		76.52	9
76.56	11	51		76.56	10
76.6	12	52		76.6	8
76.64	9	49		76.64	6
76.68	7	47		76.68	6
76.72	13	53		76.72	10
76.76	14	54		76.76	9
76.8	11	51		76.8	9
76.84	12	52		76.84	11
76.88	18	58		76.88	16
76.92	11	51		76.92	10
76.96	6	46		76.96	9
77	12	52		77	10
77.04	16	56		77.04	14
77.08	12	52		77.08	9
77.12	13	53		77.12	13
77.16	10	50		77.16	10
77.2	0	40		77.2	5
77.24	9	49		77.24	10
77.28	20	60		77.28	16
77.32	7	47		77.32	4
77.36	4	44		77.36	7
77.4	8	48		77.4	8
77.44	11	51		77.44	6
77.48	1	41		77.48	4
77.52	14	54		77.52	13
77.56	11	51		77.56	11
77.6	9	49		77.6	8
77.64	19	59		77.64	16
77.68	11	51		77.68	11
77.72	6	46		77.72	9
77.76	27	67		77.76	19
77.8	8	48		77.8	10
77.84	12	52		77.84	12
77.88	17	57		77.88	15
77.92	7	47		77.92	4
77.96	14	54		77.96	13
78	8	48		78	4
78.04	16	56		78.04	12
78.08	9	49		78.08	8
78.12	13	53		78.12	7
78.16	11	51		78.16	10
78.2	3	43		78.2	6
78.24	12	52		78.24	13
78.28	8	48		78.28	11
78.32	10	50		78.32	12
78.36	3	43		78.36	7
78.4	8	48		78.4	9
78.44	16	56		78.44	10
78.48	6	46		78.48	7
78.52	12	52		78.52	12
78.56	12	52		78.56	12
78.6	8	48		78.6	8
78.64	8	48		78.64	10
78.68	6	46		78.68	9
78.72	13	53		78.72	14
78.76	10	50		78.76	11
78.8	9	49		78.8	8
78.84	19	59		78.84	10
78.88	8	48		78.88	8
78.92	12	52		78.92	9
78.96	13	53		78.96	10
79	7	47		79	4
79.04	4	44		79.04	6
79.08	12	52		79.08	6
79.12	13	53		79.12	12
79.16	17	57		79.16	13
79.2	7	47		79.2	8
79.24	17	57		79.24	13
79.28	9	49		79.28	10
79.32	13	53		79.32	12
79.36	20	60		79.36	17
79.4	2	42		79.4	3
79.44	8	48		79.44	10
79.48	16	56		79.48	13
79.52	6	46		79.52	6
79.56	11	51		79.56	6
79.6	22	62		79.6	14
79.64	13	53		79.64	11
79.68	16	56		79.68	14
79.72	12	52		79.72	9
79.76	1	41		79.76	8
79.8	8	48		79.8	10
79.84	1	41		79.84	1
79.88	1	41		79.88	4
79.92	16	56		79.92	12
79.96	8	48		79.96	8
80	7	47		80	6
