# Supplementary material for: Green and efficient three-component synthesis of 4H-pyran catalysed by CuFe2O4@starch as a magnetically recyclable bionanocatalyst
Source: PubMed Central journal article supplement (PMC7428224; doi:10.1098/rsos.200385), 2020-07-01
Supplement: rsos200385_review_history.pdf [file rsos200385_review_history.pdf]

## **Green and efficient three-component synthesis of 4H-pyran catalysed by $\text{CuFe}_2\text{O}_4$ @starch as a magnetically recyclable bionanocatalyst**

Maryam Kamalzare, Mohammad Bayat and Ali Maleki

### **Article citation details**

*R. Soc. open sci.* **7**: 200385.

<http://dx.doi.org/10.1098/rsos.200385>

### **Review timeline**

Original submission: 18 March 2020

Revised submission: 7 May 2020

Final acceptance: 27 May 2020

Note: Reports are unedited and appear as submitted by the referee. The review history appears in chronological order.

## Review History

### RSOS-200385.R0 (Original submission)

#### Review form: Reviewer 1 (Tarek Abouelmaaty)

**Is the manuscript scientifically sound in its present form?**

Yes

**Are the interpretations and conclusions justified by the results?**

Yes

**Is the language acceptable?**

No

**Do you have any ethical concerns with this paper?**

No

**Have you any concerns about statistical analyses in this paper?**

Yes

**Recommendation?**

Major revision is needed (please make suggestions in comments)

**Comments to the Author(s)**

In this work, the authors reported on the synthesis of heterogeneous nanocatalyst based on a biopolymer followed by multicomponent reaction for the synthesis of 4H-pyran derivatives. The idea is interesting and off added value to researchers in the field of nano materials, however some flaws have been observed in the manuscript that i can outline as follow:

- English is poor and needs professional editing.
- Abstract should be modified to be more informative.
- Introduction failed to show the novelty of the current work in relation to previous publications.
- conclusion should be different than abstract and includes the optimum conditions for the obtained results.
- References are too many for an article, also ref 37 is not consistent with the style.

I recommend major revision

**Review form: Reviewer 2**

**Is the manuscript scientifically sound in its present form?**

Yes

**Are the interpretations and conclusions justified by the results?**

Yes

**Is the language acceptable?**

No

**Do you have any ethical concerns with this paper?**

No

**Have you any concerns about statistical analyses in this paper?**

No

**Recommendation?**

Accept with minor revision (please list in comments)

**Comments to the Author(s)**

In this manuscript authors have used starch as a biocompatible solid support to design magnetic nanobiocatalyst for three component coupling reaction for the synthesis of 4H-pyran derivatives. Utilization of bio support and magnetic separation are the advantages of this work. But several useful information are not provided in this manuscript. Thus, I recommend this manuscript for publication after a revision addressing the comments given below:

Introduction is not written properly. Several other catalysts which can catalyze this three component coupling reactions involving activated aromatic compounds, aromatic aldehyde and malononitrile should be referred. See and include: Dalton Trans., 2013, 42, 10515-10524; RSC Adv., 2012, 2, 11306-11317.

Electron microscopic image as presented in Figure 3 is of very low resolution. It is very hard to understand the particle size and shape from this image. Better quality image should be provided.

In the powder XRD pattern shown in Figure 4, peaks corresponding to the CuFe<sub>2</sub>O<sub>4</sub> phase should be indexed.

Powder XRD pattern of the used CuFe<sub>2</sub>O<sub>4</sub>@starch catalyst after six reaction cycles should be provided.

Thorough English language editing is needed.

## Decision letter (RSOS-200385.R0)

15-Apr-2020

Dear Professor Maleki:

Title: Green and efficient three-component synthesis of 4H-pyran catalyzed by CuFe<sub>2</sub>O<sub>4</sub>@starch as a magnetically recyclable bionanocatalyst  
Manuscript ID: RSOS-200385

Thank you for your submission to Royal Society Open Science. The chemistry content of Royal Society Open Science is published in collaboration with the Royal Society of Chemistry.

The editor assigned to your manuscript has now received comments from reviewers. We would like you to revise your paper in accordance with the referee and Subject Editor suggestions which can be found below (not including confidential reports to the Editor). Please note this decision does not guarantee eventual acceptance.

Please submit your revised paper before 08-May-2020. Please note that the revision deadline will expire at 00.00am on this date. If we do not hear from you within this time then it will be assumed that the paper has been withdrawn. In exceptional circumstances, extensions may be possible if agreed with the Editorial Office in advance. We do not allow multiple rounds of revision so we urge you to make every effort to fully address all of the comments at this stage. If deemed necessary by the Editors, your manuscript will be sent back to one or more of the original reviewers for assessment. If the original reviewers are not available we may invite new reviewers.

To revise your manuscript, log into <http://mc.manuscriptcentral.com/rsos> and enter your Author Centre, where you will find your manuscript title listed under "Manuscripts with Decisions." Under "Actions," click on "Create a Revision." Your manuscript number has been appended to denote a revision. Revise your manuscript and upload a new version through your Author Centre.

When submitting your revised manuscript, you must respond to the comments made by the referees and upload a file "Response to Referees" in "Section 6 - File Upload". Please use this to document how you have responded to the comments, and the adjustments you have made. In order to expedite the processing of the revised manuscript, please be as specific as possible in your response.

Once again, thank you for submitting your manuscript to Royal Society Open Science and I look forward to receiving your revision. If you have any questions at all, please do not hesitate to get in touch.

Yours sincerely,  
Dr Laura Smith  
Publishing Editor, Journals

Royal Society of Chemistry  
Thomas Graham House

Science Park, Milton Road  
Cambridge, CB4 0WF  
Royal Society Open Science - Chemistry Editorial Office

On behalf of the Subject Editor Professor Anthony Stace and the Associate Editor Dr Ya-Wen Wang.

\*\*\*\*\*

RSC Associate Editor:  
Comments to the Author:  
(There are no comments.)

RSC Subject Editor:  
Comments to the Author:  
(There are no comments.)

\*\*\*\*\*

Reviewers' Comments to Author:  
Reviewer: 1

Comments to the Author(s)

In this work, the authors reported on the synthesis of heterogeneous nanocatalyst based on a biopolymer followed by multicomponent reaction for the synthesis of 4H-pyran derivatives. The idea is interesting and off added value to researchers in the field of nano materials, however some flaws have been observed in the manuscript that i can outline as follow:

- English is poor and needs professional editing.
- Abstract should be modified to be more informative.
- Introduction failed to show the novelty of the current work in relation to previous publications.
- conclusion should be different than abstract and includes the optimum conditions for the obtained results.
- References are too many for an article, also ref 37 is not consistent with the style.

I recommend major revision

Reviewer: 2

Comments to the Author(s)

In this manuscript authors have used starch as a biocompatible solid support to design magnetic nanobiocatalyst for three component coupling reaction for the synthesis of 4H-pyran derivatives. Utilization of bio support and magnetic separation are the advantages of this work. But several useful information are not provided in this manuscript. Thus, I recommend this manuscript for publication after a revision addressing the comments given below:

Introduction is not written properly. Several other catalysts which can catalyze this three component coupling reactions involving activated aromatic compounds, aromatic aldehyde and malononitrile should be referred. See and include: Dalton Trans., 2013, 42, 10515-10524; RSC Adv., 2012, 2, 11306-11317.

Electron microscopic image as presented in Figure 3 is of very low resolution. It is very hard to understand the particle size and shape from this image. Better quality image should be provided.

In the powder XRD pattern shown in Figure 4, peaks corresponding to the CuFe<sub>2</sub>O<sub>4</sub> phase should be indexed.

Powder XRD pattern of the used CuFe<sub>2</sub>O<sub>4</sub>@starch catalyst after six reaction cycles should be provided.

Thorough English language editing is needed.

## Author's Response to Decision Letter for (RSOS-200385.R0)

See Appendix A.

## Decision letter (RSOS-200385.R1)

We hope you are keeping well at this difficult and unusual time. We continue to value your support of the journal in these challenging circumstances. If Royal Society Open Science can assist you at all, please don't hesitate to let us know at the email address below.

Dear Professor Maleki:

Title: Green and efficient three-component synthesis of 4H-pyran catalyzed by CuFe<sub>2</sub>O<sub>4</sub>@starch as a magnetically recyclable bionanocatalyst  
Manuscript ID: RSOS-200385.R1

It is a pleasure to accept your manuscript in its current form for publication in Royal Society Open Science. The chemistry content of Royal Society Open Science is published in collaboration with the Royal Society of Chemistry.

The comments of the reviewer(s) who reviewed your manuscript are included at the end of this email.

Thank you for your fine contribution. On behalf of the Editors of Royal Society Open Science and the Royal Society of Chemistry, I look forward to your continued contributions to the Journal.

Yours sincerely,  
Dr Laura Smith  
Publishing Editor, Journals

Royal Society of Chemistry  
Thomas Graham House  
Science Park, Milton Road  
Cambridge, CB4 0WF  
Royal Society Open Science - Chemistry Editorial Office

On behalf of the Subject Editor Professor Anthony Stace and the Associate Editor Dr Ya-Wen Wang.

\*\*\*\*\*

RSC Associate Editor  
Comments to the Author:  
(There are no comments.)

\*\*\*\*\*

Reviewer(s)' Comments to Author:

## Appendix A

**Dear Dr. Laura Smith, Publishing Editor:**

Thank you so much for your kind e-mail message on April 15, 2020; and very useful Reviewers' comments and editorial suggestions on our manuscript (ID: RSOS-200385). It is our great pleasure to submit the enclosed revised manuscript to be considered for publication in *the Royal Society Open Science*. We have modified the manuscript accordingly (as highlighted by the yellow color in Text), and detailed corrections are listed point by point as follows:

\*\*\*\*\*

**Comments from the editors and reviewers:**

***-Reviewer 1***

In this work, the authors reported on the synthesis of heterogeneous nanocatalyst based on a biopolymer followed by multicomponent reaction for the synthesis of 4H-pyran derivatives. The idea is interesting and off added value to researchers in the field of nano materials, however some flaws have been observed in the manuscript that I can outline as follow:

- English is poor and needs professional editing.

Answer: We greatly appreciate your careful reading and reviewing our manuscript. The whole Text was edited by an official English translator.

- Abstract should be modified to be more informative.

Answer: Thank you for your comment. It was done in the main manuscript in the abstract section.

- Introduction failed to show the novelty of the current work in relation to previous publications.

Answer: Thank you for your insightful comment. It was done in the main manuscript in the introduction section.

- Conclusion should be different than abstract and includes the optimum conditions for the obtained results.

Answer: Thank you for your comment. It was done in the main manuscript in the conclusion section.

- References are too many for an article, also ref 37 is not consistent with the style.

Answer: Thank you for your comment. The number of references was decreased as much as possible.

### ***Reviewer 2***

In this manuscript authors have used starch as a biocompatible solid support to design magnetic nanobiocatalyst for three component coupling reaction for the synthesis of 4H-pyran derivatives. Utilization of bio support and magnetic separation are the advantages of this work. But several useful information are not provided in this manuscript. Thus, I recommend this manuscript for publication after a revision addressing the comments given below:

- Introduction is not written properly. Several other catalysts which can catalyze this three component coupling reactions involving activated aromatic compounds, aromatic aldehyde and malononitrile should be referred. See and include: Dalton Trans., 2013, 42, 10515-10524; RSC Adv., 2012, 2, 11306-11317.

Answer: Thank you for your comment. Sure, they are worthy reports and were used in the introduction section.

- Electron microscopic image as presented in Figure 3 is of very low resolution. It is very hard to understand the particle size and shape from this image. Better quality image should be provided.

Answer: Thank you for your comment. The Electron microscopic image of bionanocatalyst was replaced (Figure 3).

- In the powder XRD pattern shown in Figure 4, peaks corresponding to the  $\text{CuFe}_2\text{O}_4$  phase should be indexed.

Answer: Thanks for your admirable attention. The indices of the peaks were shown in XRD patterns (Figure 4).

- Powder XRD pattern of the used  $\text{CuFe}_2\text{O}_4$ @starch catalyst after six reaction cycles should be provided.

Answer: Thank you for your comment. The powder XRD pattern of the reused catalyst was added in the main manuscript (Figure 4).

- Thorough English language editing is needed.

Answer: Thank you for your comment. The whole Text was edited by an official English translator.
